# Supplementary material for: Altered heat nociception in cockroach Periplaneta americana L. exposed to capsaicin
Source: PLoS One. 2018 Mar 8;13(3):e0194109. doi: 10.1371/journal.pone.0194109 (PMC5843330; doi:10.1371/journal.pone.0194109)
Supplement: S1 Spreadsheet — Latency to escape from noxious heat—50°C (s; raw data) after administration of water (Con), vehicle (V), capsaicin 0.0001mM (C 0.1) and 0.1mM (C100), menthol 2mM (M), thymol 1mM (T), camphor 15mM (CMF), allyl isothiocyanate 3mM (AITC) and capsazepine 0.0001mM (CPZ) in American cockroaches. Single and five-trial heat box test. (XLSX) [file pone.0194109.s001.xlsx]

## Sheet: single trial
	Single-trial heat box test
	Latency to escape (seconds)
		control		alcohol (vehicle)		capsaicin 0.1µM		capsaicin 100µM		menthol 2mM		thymol 1 mM		camphor 15 mM		AITC 3 mM		capsazepine 0.1µM
		males	females	males	females	males	females	males	females	males	females	males	females	males	females	males	females	males	females
		3.02	6.12	4.25	1.25	19.09	5.12	69.75	7.5	11.62	4.72	1.22	2.78	1.13	6.84	3.66	0.66	10.53	11.91
		2.15	0.9	6.08	3.15	8.97	1.6	36.41	6.44	0.53	10.28	13.59	1.41	1.35	4.07	1.91	0.54	74.9	2.72
		2.41	2.81	2.9	7.09	3.97	12.16	6.44	2.22	17.32	1.19	3.28	3.91	2.35	7.32	2.72	1.4	62.88	94.72
		8.16	1.97	1.43	3.56	2.28	3.6	0.97	8.12	1.03	5.69	1.97	1.93	7.34	8.68	2.31	0.31	12.03	3.56
		1.19	3.87	2.56	14.84	32.9	35.97	2.72	8.16	5.72	7.69	4.66	4.75	112.5	2.22	2.28	1.28	70.53	49.3
		2.02	2.43	3.8	5.28	6.31	2.31	10.43	3.19	0.4	5.94	1.85	11.87	0.81	1.93	3.75	1.84	2.04	7.41
		3.56	5.21	3.94	5.31	10.47	3.84	1.4	4.66	3.68	0.87	22.91	10.06	19.9	3.34	0.91	3.34	102.53	104.41
		5.24	3.18	4.06	2.44	0.9	71.66	5.53	3.85	4.63	2.41	6.75	7.53	6	1.66	2.25	1.38	12.38
		0.81	2.2	5.19	3.5	8.46		6.46	14			1.56		5.91	4.75	9.38	5.78	0.91
		4.16	16	2.53	6.17			16.29				30.32		4.22	70.69	2	1.44	0.62
		3.9	7.66	10.5	2.63									37.84	6.21	4.47	5.69	34.5
		0.44	5.13	4.94	1.47									3.22	70.85	2.56	2.91	15.53
		1.63	3.62	7.35	2.12									23.62	45.72	5.72	8.03
		0.35	1.59	14.72	1.03									11.75	8.28	5.84	36.37
		6.56	3.22	3.04	7.59									1.81	4.53	17.32	4.78
		3.91	3.62	3.09	3.19									38.84	20	52.47	9.12
		1.25	1.82	1.28	1.28									1.22	5.72	4.19	25.9
			2.35		1.47									21.69	6.5	11.06	5.46
					1.16									34.66	56.62	5.31	3.4
					3.94									43.63		38.59
	mean	2.98588	4.09444	4.80353	3.9235	10.3722	17.0325	15.64	6.46	5.61625	4.84875	8.811	5.53	18.9895	17.6805	8.935	6.29632	33.2817	39.1471
	sd	2.18274	3.43162	3.40356	3.26229	10.0114	24.8361	21.7125	3.57599	5.99843	3.26564	10.2295	3.8812	34.3116	21.0588	2.35129	1.63494	35.1677	44.3342
mean males+females			3.54016		4.36351		17.8609		14.5069		5.2325		7.1705		18.335		7.61566		36.2144
	sd		2.90621		3.31106		23.8394		16.235		4.68241		8.02596		24.8412		11.4377		37.6753
	s.e.m.		0.491239		0.544335		4.28168		2.9641		1.1706		1.89174		3.97777		1.8315		8.6433
difference to control group					0.823351		14.3208		10.9668		1.69234		3.63034		14.7948		4.07549		32.6742
difference to alcohol group			-0.823351				13.4974		10.1434		0.868985		2.80699		13.9715		3.25214		31.8509
no of individuals that did		0	0	0	0	0	0	0	0	0	1	0	0	0	0	0	1	0	0
not left heat box
dead n (day)			1 (4D)	1 (4D)		1 (2D)	1 (2D)	0	1 (2D)	2 (3D)	1 (2D)	0	0		1 (1D)	0	0	0	0
							1 (4D)
					ADDITIONAL DATA - without sex division
					capsaicin 0.1µM		capsaicin 100µM
						5.81	21.59
						21.31	15.97
						35.01	34.06
						7.53	1.96
						2.2	3.68
						5.38	5.4
						2.91	5.43
						4.28	3.69
						3.5	53.84
						110.94	2.03
						45.82	18.84
						2.9
						7.03
						3.75
					mean	18.455	15.1355

## Sheet: five trial
	Five-trial heat box test
	Latency to escape (seconds)
	control											alcohol (vehicle)											capsaicin 0.1µM											capsaicin 100µM											camphor 15 mM
	1x		2x		3x		4x		5x			1x		2x		3x		4x		5x			1x		2x		3x		4x		5x			1x		2x		3x		4x		5x			1x		2x		3x
	males	females	males	females	males	females	males	females	males	females		males	females	males	females	males	females	males	females	males	females		males	females	males	females	males	females	males	females	males	females		males	females	males	females	males	females	males	females	males	females		males	females	males	females	males
	1.5	38.1	3.56	7.31	10.78	10.44	10.34	8.63	0.31	10.34		1.03	7	2.72	6.09	5.69	0.4	1.6	3.81	3.78	4.53		3.43	3.28	14.03	10.19	0.59	5	14.71	3.59	44.12	2.22		2.85	3.68	4.35	7	14.34	5.78	6.31	4.29	43	11.85		5.59	6.65	3.06	2.5	3
	3.65	7.47	1.69	20.31	5	9.97	11.72	8.03	20.03	6.03		3.35	9.28	4.09	4.62	6.32	0.31	0.69	7.37	8.47	4.22		2.87	5.31	0.75	10.6	7.06	6.75	4.81	4.97	3.66	1.91		1.97	6.22	23.31	1.84	5.87	5.12	7.72	5.94	4.78	0.53		2.97	1.15	4.62	0.57	22.87
	11.32	4.75	5.31	11.4	3.72	16.53	0.31	2.28	11.56	10.34		29.25	2.6	0.5	4.6	4.4	23.91	5.22	5.25	22.5	19.15		12.66	5.38	3.16	2.37	2.81	2.69	0.5	2.78	4.31	16.59		2.59	4.56	0.96	9.15	6	5.03	6.72	3.62	11.75	10.25		15.34	1.19	0.56	13.16	10
	2	13.72	40.22	27.42	5.38	7.69	7.6	5.25	1.5	4		8.34	2.78	16.25	6.96	14.37	0.11	17.22	0.63	7.69	5.91		1	2.44	8.25	4.72	0.47	8.91	16	4.75	3.97	21.06		5.75	0.66	6.15	3.5	14.22	9.53	5.5	11.66	14.18	2.28		1.47	0.4	7.88	4.32	29.97
	1.35	27.25	9.85	14.82	9.25	8.31	5.35	6.04	2.84	11.87		0.75	0.81	4.47	9.16	5.25	6.62	10.69	1.97	10.03	1.44		1.56	3.4	11.75	8.03	1.34	5.65	5.62	4.03	53.37	4.34		1.94	2.22	11.31	4.5	0.81	19.44	6.87	4.47	10.78	3.69		3.5	3.16	30.84	20.19	10.03
	4.09	5.63	6.22	4.63	17.65	8.81	6.1	7.09	3.56	1		4	1.09	2	1.03	6.72	13	9.47	14.59	1.21	4.65		7.22	3.19	0.37	0.44	6.47	7.53	9.9	2	58.38	13.81		9.53	6.1	3.28	7.47	6.91	4.91	41.22	2.03	7.25	13.53		5.94	1.6	4.09	8.82	5.06
	3.19	1.28	20.07	4.53	0.53	9.25	12.28	1.19	7.16	3.34		4.56	2.46	16.13	12.37	6.78	2.85	0.59	3.19	1.5	8.03		1.97	2.44	4.97	6.81	7.25	0.63	8.78	25.66	12.44	15.25		0.97	0.25	1	9.75	5.09	8.16	3.09	1.81	3.59	5.34		1.97	0.43	11.47	6.97	0.41
	21.53	17.91	5.91	7.37	1.53	1.94	1.85	15.25	1.59	8.59		5.34	0.53	0.71	4.19	0.66	1.19	4.25	8.59		1.28		1.66	2.66	1.19	2.85	7.35	10.59	5.94	1.94	14.44	5.43		5.07	5.12	4.88	9.88	4.81	47.12	5.72	15.31	8.28	0.94		11.15	3.47	4	3.75	7.35
	26.66	10.5	3.5	10.44	3.75	17.32	5.25		7.06			9.5	1.84	9.47	1.91	3.81	0.47	13.41	13.97				3.19	1.19	19.56	3.78	10.28	5.09		3.78		4.87		0.53	1.03	4.72	0.78	4.97	5.59	4.4	67.1	69.13	74.28		1.81	3.03	0.75	5.38	45.72
	13.03	6.63	35.21		14.25	2.18	22.13		1.81			1.65	2.75	4.7	8.2	2.91	18.91		8.94				1.03	0.97	4.28	0.41	35.87	36.87		62.03				1.56	0.72	2.53	27.44	6.12		61.25					1.1	9.85	2.62
	6.19	8.75	4.53	2.32	32.22	7.41	12.47	15.28	17.84	4.13		4.59	7.53	3.09	3.81	6.19	34.97	12.47	15.28	17.84	4.13		2.02	16.16	39.22	6.78	2.25	3.87	86.16	23.19	3.47	35.91		3	16.5	94.28	8.19	76.47	6.37	32.78	37.38	135.91	4.19		45.72	4.37	9.66	4.5	2.72
	1.54	10.84	3.38	1.21	3.09	9.12	9.22	10.03	7	13.65		2.78	1.38	15.25	14.07	15.85	16.38	9.22	10.03	7	13.65		2.44	1.87	2.97	117.66	7.44	28.5	25.59	24.22	65.84	5.16		3.09	7.88	48.25	4.19	10.75	3.03	81.85	39.29	6.09	2.82		3.72	8.75	1.28	4.97	50.13
	3.53	11.04	5.72	4.87	0.93	12.78	1.84	6.28	12.65	8.28		12.31	4.28	12.5	14.35	7.41	5.75	1.84	6.28	12.65	8.28		3.34	2.06	4.25	1.63	5.03	9.94	4.47	3.91	6.22	5.35		13.31	9.54	3.53	6.15	11.09	5.44	86	2.75	4.91	8.6		14.69	8.91	15.91	20.69	2.78
	1.66	28.97	18.56	11.53	13.03	7.59	25.88	11.47	6.91	2.16		15.09	2.88	2.06	10.41	19.72	3.59	25.88	11.47	6.91	2.16		12.45	45.56	4	38.28	17.56	5.53	4.41	4.03	64.22	2.62		3.07	0.3	47.05	14.59	5.34	113.75	4	26.19	23.75	9.62		45.66	1.97	3.5	3.46	10.97
	2.34	27.68	7.47	5.12	8.22	12.87	22.47	4.03	9.75	8.41		11.43	13.78	4.91	3.13	3.56	1.44	22.47	4.03	9.75	8.41		37.75	2.59	2.44	4	3.06	95.41	127.25	5.38	33.9	7.25		2.28	11.91	6.78	3.56	3.59	124.88	79.12	3.19	9.65	6.94		4.75	5.19	3.03	1.25	17.32
	3.15	4.93	3.69	19.22	5.38	12.66	8.16	8.56	1.53	10.63		1.06	5.1	11.63	7.6	6.62	4.75	8.16	8.56	1.53	10.63		2.33	3.28	2.22	100.23	4.18	9.91	4.9	6.69	155.66	176.19		50.25	40.78	10.22	4.32	3.5	5.31	5	69.81	5.15	69.91		7.72	2.56	2.87	17.88	6.12
	2.31	2	4.41	10.53	5.22	11.75	2.71	6.72		3.28		13.28	14.03	13.09	10.3	12.93	2.78	2.71	6.72		3.28		58.34	3.84	4.63	1.88	12.34	20.41	1.75	2.49	11.34	76.78		2.41	5.62	2.16	3.81	4.25	10.66	131.1	155.62	7.72	15.1		2.78	5.5	11.16	2.09	18.03
	1.15	14.34	9.13	4.85	10.56	18.09	7.19					1.9	6.03	13.12	7.6	7		7.19					9.31	15.68	83.25	2.84	11.53	6.28	87.81	33.07	14.66			2.13	52.69	9	6.31	97.5	57.59	4.06	62.43	5.38	3.68		2.09	12	3.53	1.72	23.53
	3.56	7.5	2.62	14.03								2.28	5.84										3.03	5.82	2.28	2.44	3.56	229.56	9.34	4.41	3.87			23.62	1.12	4.63	2.12	72.28	7.97	5.97	115.78	6.02	26.59		14	7.56	3.22	1.4	24.68
	2.44	20.19										8.63	9.34										5.13	34.91	12.81	11.66	3.6	3.53	5.75	9.06				28.22	4.9	10.5	5.12	3.19	34.31	1.87	3.09	4.03	3.28		5.75	3.59	5.85	1.66	51.59
																							2.78	5.31	3.87	3.72	23.75	55.16	84.56					2.34	5.44	16.71	6	2.65	25.28	4.47	95.72	100.66			36.28	32.6	6.78	8.97	38.1
	2.53	0.4	0.28	3.5	5.69	4.34	2.9	6.96	10.96	2.91													2.91	2.31	2	1.69	3.91	6.59	9.53					3.68	0.28	8.29	2.84	5.31	3.25	1.87	16.44	3.75			13.54	37.16	8.62	3.16	25.18
	2.53	7.06	0.31	3.28	3.12	3.56	11.6	3.31	7.69	1.16													1.2	2.5		13.22		28.71							5.44		3.03		73.78						14.8	27.59	4.57	7.65	29.66
	10.84	1.75	5.78	15.47	1.69	1	0.31	0.5	6.47	2.9													4.96	36.4		4.41		7.81							10.72		3.72		5.72						3.56	3.19	12.78	12.75	32.25
	6.31	2.13	4.31	4.87	0.32	2.13	4.25	6.34	3.12	2.37														7.34		10.22									3.5		3.72		38.94						3.87	4.87	4.66	14.82	11.59
	9.29	6	1.18	9.44	13.5	3.06	8.81	0.44	12.31	1.65														3.44		3.25									2.46		11.59								8.87	19.69	2.56	2.07	28.47
	0.65	7.94	9.47	1.13	0.78	1.28	14.82	2.25	9.37	0.68																									2.72										6.56	2.94	14.28	3.63
	8.66	10.87	14.87	0.32	6.81	1.03	2.19	0.22	1.69	2.19																									2.31										15.12	19.85	3.41	2.72
	2.57	3.25	1.12	3.15	0.35	8.27	13.72	0.5	7.97																																				16.66	4.5		5.9
	1.06	0.66	8.25	2.46	13.43	6.5	18.82																																						7.47	5.81
	8.03	7.4	16.03	5		0.78
mean	5.622	10.5647	8.71207	8.23321	7.26593	7.73786	9.27	5.9413	7.195	5.45045		7.056	5.0665	7.59389	7.24444	7.56611	8.08412	9.00471	7.68706	8.52769	6.65		7.69083	8.43577	10.5568	14.3888	8.07727	25.0383	25.889	11.599	32.5806	24.6713		7.73455	7.66679	14.7223	6.56038	16.5936	26.1233	26.6768	35.4248	23.1314	14.3905		10.815	8.31767	6.69857	6.67679	20.3012
mean males+females		8.09333		8.47264		7.50189		7.60565		6.32273			6.06125		7.41917		7.82511		8.34588		7.58885			8.0633		12.4728		16.5578		18.744		28.6259			7.70067		10.6413		21.3585		31.0508		18.761			9.56633		6.68768
sd		8.25433		8.18356		6.08956		6.11527		4.73454			5.66261		4.84437		7.72478		6.07359		5.59394			12.4394		24.4906		36.1392		29.1491		41.5174			11.7325		15.7749		31.2797		40.1579		29.7066			10.7694		6.03558
s.e.m.		1.06563		1.08394		0.821116		0.864829		0.69807			0.895337		0.807396		1.30573		1.04161		1.05716			1.75919		3.53492		5.32843		4.60888		7.22725			1.65923		2.27692		4.61194		5.92095		4.69702			1.39033		0.806539
		Con	V	C 0.1	C 100	M	T	CMF	AITC	CPZ
means	1 dose	8.09333	6.06125	8.0633	7.70067	5.01522	4.35412	9.56633	8.585	4.4626
	2 dose	8.47264	7.42	12.4728	10.6413	8.618	9.46312	6.68768	7.3885	7.542
	3 dose	7.50189	7.82511	16.5578	21.3585	10.5187	9.7855	18.6366	15.1673	10.9112
	4 dose	7.60565	8.34588	18.744	31.0508	6.76571	9.41525	17.1183	14.1799	12.9662
	5dose	6.32273	7.58885	28.6259	18.761	4.91869	6.58958	25.8251	13.6947	26.8183
		Con	V	C 0.1	C 100	M	T	CMF	AITC	CPZ
sem	1 dose	1.06563	0.895337	1.75919	1.65923	1.1644	1.17944	1.39033	0.947019	0.645142
	2 dose	1.08394	0.807396	3.53492	2.27692	2.03312	2.33216	0.806539	0.810707	1.44782
	3 dose	0.821116	1.30573	5.32843	4.61194	3.08234	2.13597	2.17921	2.41113	1.91229
	4 dose	0.864829	1.04161	4.60888	5.92095	1.33834	1.95121	2.63266	2.14465	2.31426
	5dose	0.69807	1.05716	7.22725	4.69702	1.00081	1.64386	4.22954	2.2644	4.8965
[truncated: 45 more columns]

## Sheet: mortality
		Mortality
	dead individuals
		Single-trial heat box test										Five-trial heat box test
	day	Con	A	C 0.1	C 100	M	T	CMF	AITC	CPZ		day	Con	A	C 0.1	C 100	M	T	CMF	AITC	CPZ
	1.	0	0	0	0	0	0	0	0	0		1.	0	0	0	0	0	0	0	0	0
	2.	0	0	0	0	1	0	1	0	0		2.	0	1	0	0	2	0	2	0	0
	3.	0	0	2	1	2	0	0	0	0		3.	0	1	0	1	2	1	1	1	0
	4.	0	0	0	0	0	0	0	0	0		4.	2	0	1	0	1	2	1	0	2
	5.	1	1	1	0	0	0	0	0	0		5.	0	4	0	0	0	0	2	0	1
	suma	1	1	3	1	3	0	1	0	0			2	6	1	1	5	3	6	1	3
	number of individuals that did not left heat box
		Single-trial heat box test										Five-trial heat box test
												day	Con	A	C 0.1	C 100	M	T	CMF	AITC	CPZ
	day	Con	A	C 0.1	C 100	M	T	CMF	AITC	CPZ		1.	0	0	0	0	0	0	0	1	0
	5.	0	0	0	0	1	0	0	1	0		2.	0	0	0	0	0	0	1	0	1
												3.	0	0	0	0	0	0	1	0	0
												4.	0	0	0	0	0	0	2	1	0
												5.	0	0	12	8	0	0	5	0	4
													0	0	12	8	0	0	9	2	5
