# Supplementary material for: Altered heat nociception in cockroach Periplaneta americana L. exposed to capsaicin
Source: PLoS One. 2018 Mar 8;13(3):e0194109. doi: 10.1371/journal.pone.0194109 (PMC5843330; doi:10.1371/journal.pone.0194109)
Supplement: S2 Spreadsheet — Temperatures preferred by cockroaches exposed to test drugs after repeated application (5 doses). (XLSX) [file pone.0194109.s002.xlsx]

## Sheet: data
	temperature preferred by cockroaches exposed to test drugs - repeated exposition (5 times)
		males
		females												mean for the first 24 hours										standard deviation for the 24-hour mean
	no. of indiv.	time (hours)	alcohol	caps 0.1µM	caps 100µM	menthol	thymol	camphor	aitc	capsazepine					alk	caps 0.1	caps 100	m	t	cmf	aitc	kpz			alk	caps 0.1	caps 100	m	t	cmf	aitc	kpz
	n=1	1	29.9	28.1	25.1	28.8	29.5	30.5	24.7	29.2				1	27.125	26.3667	29.5583	29.7667	28.8833	29.8667	26.5444	29.225		1	2.56449	6.41608	2.6061	1.23754	1.8245	1.44495	2.96695	2.65437
		3	29	27.6	24.7	29.9	29.8	30.98	28.96	29.4				3	27.465	26.655	29.0333	29.7317	29.0517	29.4683	27.4267	29.8067		3	1.47237	4.50805	1.93408	0.725557	1.82628	1.46715	2.62819	1.99575
		5	28.55	28.35	25.45	29.85	29.875	30.9	28.9	28.8				5	27.7312	28.1937	28.9458	29.9812	29.7458	29.2188	28.1972	30.0083		5	0.890616	1.75172	1.78825	0.551972	0.579952	1.98148	1.86608	1.56352
		7	28.1	27.725	26.625	29.85	29.875	30.5	28.15	28.3				7	27.4646	27.7792	28.5979	29.4854	29.1812	29.2625	28.4694	29.325		7	1.13635	2.13618	1.54108	1.42886	1.37043	1.39184	1.4131	1.92171
		9	27.125	28.1	28.4	28.725	29.875	30.5	27.775	26.425				9	26.875	27.875	29.1083	29.8083	29.5521	29.3042	28.2583	29.5312		9	2.01074	1.70427	1.46339	1.10095	0.828845	1.46217	1.38457	1.96677
		11	26.325	27.35	27.45	29.5	29.875	31.025	27.4	27.075				11	26.35	28.0813	28.8729	29.4583	29.4229	29.7312	28.2028	29.4625		11	2.70559	1.39655	1.12373	0.957348	0.667718	1.32069	1.4107	1.3318
		13	28.1	25.475	27.45	28.75	29.5	28.7	28.525	25.45				13	26.4417	27.1354	29.0542	29.2083	29.9	29.3604	28.2667	30.0083		13	2.92544	2.09774	0.936254	0.717899	0.716843	1.20804	1.41316	1.61644
		15	27.2	26.975	28.4	29.85	28.95	29.6	27.4	25.075				15	26.4729	27.4333	28.8896	29.3604	29.4229	29.6375	28.1361	29.6417		15	2.93806	1.12267	0.712586	1.0102	1.06975	1.71151	1.16237	2.27749
		17	26.85	27.725	28.4	29.85	29.6	30.5	28.15	24.8				17	26.375	27.6208	28.8271	29.6042	29.5542	29.8271	28.2444	29.3667		17	2.92658	1.49164	0.592707	0.721648	0.686463	1.86061	1.16772	1.5506
		19	27.2	28.1	28.4	29.15	28.675	29.6	28.525	23.675				19	26.1521	27.4062	28.6937	29.1833	29.4333	29.4917	28.0694	29.4812		19	2.96611	1.20171	1.02003	0.839327	1.30625	2.75473	0.8851	1.9751
		21	27.65	25.85	27.45	29.5	26.75	29.65	29.65	23.3				21	26.2542	26.8417	29.2917	29.4187	28.8292	28.9333	28.275	29.4021		21	2.93933	1.59382	1.20323	1.22131	1.35201	2.78313	1.58331	2.08287
		23	27.3	26.975	26.625	29.85	27.75	27.9	28.9	24.7				23	26.5354	27.2229	28.7833	29.1125	28.8	28.5208	28.4861	29.4896		23	3.08608	1.25338	1.89045	1.33759	1.20014	2.95192	1.31334	1.91039
		25	27.3333	28.8	27.7667	29.7333	27.5333	18.3	28.9	25.2333				25	26.8194	27.7472	28.8222	28.6972	28.9167	28.0583	28.2704	29.5778		25	2.0778	1.69536	0.984253	1.4121	1.85469	4.09548	1.35426	1.74427
	n=2	1	27.2	24.1	26.7	30.3	28.5	30.5	21	29
		3	26.36	27.26	26.46	30.04	24.7	30.56	22.12	27.96														s.e.m. for the 24-hour mean
		5	27.2	27.725	25.9	29.325	28.775	31.625	24.725	30.675					26.774	27.4122	28.9599	29.4474	29.2841	29.2831	28.0652	29.5635			alk	caps 0.1	caps 100	m	t	cmf	aitc	kpz
		7	26.85	27.4	26.7	27.825	27.4	30.75	27.5	26.7				sd	0.521231	0.55287	0.256068	0.345729	0.365107	0.520828	0.524288	0.245107		1	0.740303	1.85216	0.752315	0.357248	0.526687	0.417121	0.856484	0.766251
		9	27.325	26.8	27.7	29.65	28.4	30.5	27.325	29.45				sem	0.150466	0.1596	0.0739205	0.0998034	0.105397	0.15035	0.151349	0.0707563		3	0.425036	1.30136	0.558322	0.20945	0.527202	0.423531	0.758694	0.576123
		11	27.2	27.4	27.3	29.65	29.05	30.7	28.5	29														5	0.257099	0.505679	0.516222	0.159341	0.167418	0.572004	0.538691	0.451348
		13	27.675	26.55	28.2	29.125	30.375	29.225	28.875	29														7	0.328037	0.616663	0.444872	0.412477	0.395609	0.401789	0.407926	0.554749
		15	27.2	25.7	28.7	29	29.325	29.225	28.425	29														9	0.58045	0.491981	0.422445	0.317816	0.239267	0.422092	0.399691	0.567758
		17	27.2	26.8	28.2	30.3	29.325	29.3	28.5	29														11	0.781037	0.40315	0.324394	0.276363	0.192754	0.38125	0.407233	0.384458
		19	26.85	26.45	27.7	29.975	29.6	30.75	28.05	29														13	0.844503	0.605565	0.270273	0.20724	0.206935	0.348732	0.407945	0.466626
		21	26.85	25.95	28.7	30.3	29.6	28.025	28.5	29														15	0.848146	0.324086	0.205706	0.29162	0.308811	0.49407	0.335548	0.657455
		23	25.8	25.95	27.2	30.3	27.85	30.075	28.05	29.9														17	0.844832	0.430599	0.1711	0.208322	0.198165	0.537112	0.33709	0.447619
		25	27.2	26.5	28.7	29.4333	29.2333	30.6	27.6	29.6														19	0.856241	0.346904	0.294458	0.242293	0.377082	0.795223	0.255506	0.570163
	n=3	1	29.9	13.8	29	29.2	29.7	30.5	27.7	26.1														21	0.84851	0.460096	0.347343	0.352563	0.390292	0.803422	0.457063	0.601273
		3	28.44	19.86	28.62	29.68	30.3	29.3	27.7	27.98														23	0.890876	0.36182	0.545725	0.386129	0.346451	0.852147	0.379129	0.551483
		5	28.725	29.25	27.575	29.8	29.8	29.75	29.1	28.775														25	0.59981	0.489407	0.284129	0.407639	0.535404	1.18226	0.39094	0.503529
		7	28.725	28.9	29	29.2	30.075	30.125	27.75	30.375
		9	28.725	28.55	28.525	30.1	29.7	29.75	27.425	30.7
		11	28.725	28.65	29.475	29.8	29.525	30.125	27.7	30.325
		13	27.425	25.325	28.525	29.05	29.7	29	28.05	31.125
		15	26.75	26.65	29.475	27.175	29.425	29	27.7	30.325
		17	27.3	27.4	29	28.6	29.7	29.75	27.425	29.1
		19	24.7	28.2	29	28.3	29.7	29.375	27.7	30.375
		21	27.3	28.2	28.15	28.3	29.7	27.55	27.7	29.1
		23	27.775	27	26.725	29.2	29.7	24.35	27.7	27.175
		25	27.3	27.6667	27.2333	27.2	31.2	27.9333	27.7	28.5333
	n=4	1	22.7	32.9	30.6	29.2	31.6	28.8	26.6	24.8
		3	26.64	32.9	30.6	29.2	30.56	29.16	26.74	29.04
		5	28.5	31.075	30.05	29.75	30.7	29.8	28.8	29.3
		7	29.4	30.1	29.5	29.475	31.2	29.025	29.8	28.4
		9	28.95	28.525	30.05	28.975	30	28.9	29.3	29.7
		11	28.05	28.45	28.95	29.475	30	26.825	27.8	29.3
		13	27.6	27.125	28.4	29.25	31	26.4	29.3	29.3
		15	27.6	26.725	27.25	29.2	32	25.2	29.3	29.3
		17	27.6	28.45	28.4	29.2	30.4	24.8	29.8	29.3
		19	28.05	27.25	28.4	28.7	30.7	21.3	28	29.3
		21	27.6	27.125	29.5	28.7	30	21.3	27.8	29.3
		23	27.6	27.5	28.4	28.7	29.6	21.3	28.8	28.85
		25	27.6	27	28.4	26.1	29.8667	21.3	28.4667	28.7
	n=5	1	27.3	13.9	27.2	30.1	23.9	29	31.6	30.7
		3	28.44	16.66	28.38	30.32	26.26	31.34	30.8	31.6
		5	27.775	24.35	30	30.65	28.825	30.475	30.6	31.075
		7	27.775	23.2	29.5	31.125	27.4	30.125	31.1	31.05
		9	25.525	24.15	27.35	30.925	29.8	30.125	31.1	27.4
		11	27.05	25.125	28.675	29.4	28.775	29.75	30.725	27.725
		13	26.55	25.125	28.175	29.425	28.825	29.75	30.1	30.05
		15	27.3	26.625	28.35	29.925	28.825	29	30.1	25.075
		17	26.475	23.4	27.85	28.75	28.775	29.375	28.8	29.4
		19	25.8	24.875	27.125	29.125	26	30.125	29.6	29.4
		21	25.8	23.4	27.85	29.65	26	30.125	31.1	29.4
		23	25.8	24.275	26.325	28.975	26	29.375	31.1	29.4
		25	25.3	23	28.0667	30.1	26	29.5	29.6	29.4
	n=6	1	28.5	27.3	28.7	30	30	29.7	29.1	30.3
		3	28.02	25.98	28.42	29.48	30.32	28.28	30.24	29.7
		5	27.9	27.475	29.1	29.5	30.15	28.8	30.05	29.325
		7	28.125	27.825	29.1	30	30.15	28.475	29.575	26.475
		9	27.425	27.475	29.5	30.45	29.75	26.025	29.1	26.1
		11	26.425	28.2	29.9	29	29.75	28.8	30.05	28.95
		13	27.9	26.8	29.1	29.5	30.95	28.8	29.3	30.775
		15	28.125	27.275	29.5	29	29.75	28.8	29.15	30.3
		17	26.425	27.475	29.9	30.275	29.5	28.475	29.375	29.3
		19	27.75	26.9	29.9	28.25	30.4	27.825	29.1	29.3
		21	27.375	27.85	29.5	26.7	29	27.5	29.575	28.825
		23	28.5	27.1	28.7	25.425	28.9	27.825	29.575	29.3
		25	28.2	28.3	28.7333	26.9	29.6667	27.9333	30.8333	29.3
	n=7	1	28.7	25.6	30.1	28.8	28.4	29.3	24.9	27.3
		3	26.38	24.52	30.1	29.9	29.28	29.3	25.22	26.78
		5	26.775	26.5	30.1	29.5	29.5	28.925	26.1	26.65
		7	25.7	25.55	29.675	29.85	26.85	30	26.5	26.65
		9	27	26.5	29.675	31.075	27.45	30.35	26.5	28.65
		11	27	26.5	29.675	30.175	28.175	30.35	26.1	27.95
		13	27	24.6	30.225	29.85	30.225	30.7	26.5	30.75
		15	27	26.95	28.825	30.175	29.875	31.45	26.75	31.5
		17	27.85	27.4	28.775	29.5	29.875	32.2	26.5	30.75
		19	28.275	26.05	27.15	29.15	28.95	31.45	26.75	30.325
		21	27.85	25.1	29.675	29.85	27.85	32.2	26.1	30.325
		23	28.7	26.95	30.65	29.85	27.85	31.45	26.75	30.75
		25	28.7	29.4667	28.9667	27.8		32.2	26.5	28.7333
	n=8	1	27.5	33.6	32.9	30.3	28.5	27.9	26.4	25.7
		3	27.5	29.26	29.74	30.04	29.16	29.4	27.44	27.46
		5	27.5	28.6	29.75	30.3	29.6	29.4	28	31.725
		7	27.5	28.6	28.25	29.65	29.325	28.275	28.05	30.1
		9	27.5	28.6	28.25	29.65	29.325	29.025	28.3	31.3
		11	27.5	28.6	26.95	30.3	28.95	30.2	27.45	30.9
		13	27.5	28.6	28.7	29.975	30	29.025	25.65	31.725
		15	28.1	28.6	28.7	30.3	28.45	30.2	27.4	30.5
		17	28.1	28.6	28.7	29.65	29.6	30.6	26.65	30.175
		19	26.8	28.6	28.7	29.325	29.325	30.6	27.4	30.5
		21	27.5	28.6	30.2	30.625	28.5	31.3	27.15	30.5
		23	27.8	28.6	30.5	29.975	29.325	30.2	28.3	30.1
		25	28.7	28.6	30.5	29.8667		29.4333	27.9333	30.6333
	n=9	1	23.4	29.5	30.9	29.9	28.6	28.6	26.9	31.9
		3	26.6	27.5	30.9	30.68	29.78	29.6	27.62	32.1
		5	27.5	27	30.9	30.875	29.7	29.1	27.5	29.4
		7	27.8	25.7	30.9	30.15	29.425	28.85	27.8	31.15
		9	27.5	27.325	29	30.225	30.075	28.85	27.5	31.775
		11	27.5	28.3	29	28.75	29.7	30	28.1	30.4
		13	28.1	25.7	29.925	29.5	30.075	29.6	28.1	30.775
		15	28.1	27	29	29.55	30.075	30.4	27	31.4
		17	28.1	27.975	29	29.5	30.825	31.2	29	30.125
		19	27.8	27.65	29.95	28.7	30.825	31.15	27.5	30.775
		21	27.5	26.025	29	29.5	29.8	29.5	26.9	30.4
		23	27.8	27.65	29	29.5	29.8	28.6	27.2	30.125
		25	27.9	28.3	29	28.8333		28.6	26.9	31.4
	n=10	1	23.3	29.7	28.7	33.1	28.8	33.6		31.8
		3	24.2	30.08	30.08	30.3	29.68	30.02		31.8
		5	25.65	29.7	30.05	30.575	30	30.075		31.1
		7	25.9	27.95	29.6	30.575	30.7	30.075		30.125
		9	21.2	27.675	29.15	30.85	30.4	30.775		30.75
		11	18.325	28.8	28.7	31.125	30.4	30.775		30.4
		13	17.6	29.7	30.05	29.25	29.7	29.8		30.4
		15	17.6	28.8	29.975	30.3	29.625	30.075		31.45
		17	17.6	28.5	28.7	30.85	28.125	30.625		29.65
		19	17.6	27.4	29.6	30.85	28.8	30.625		31.1
		21	17.6	27.4	31.25	31.4	30	29.775		31.2
		23	17.6	27.95	29.175	30.3	29.225	30.9		31.45
		25	21.4	28.5	30.5	30.3		30.9		30.8667
	n=11	1	28.9	29.5	34.5	29.2	30.1	29.8		31.9
		3	29.2	29.76	28.9	29.38	30.56	30.02		31.64
		5	28.5	29.5	28.175	30.375	30.525	28.025		31.275
		7	26.1	30.8	25.6	30.375	28.775	29.3		31.6
		9	26.325	30.8	28.675	29.875	30.1	29.8		31.25
		11	24.8	30.8	30.1	29.125	30.1	30.625		30.925
		13	24.8	29.825	30	29.625	29.8	30.075		30.6
		15	24.8	29.5	29	30.1	27.525	31.9		30.525
		17	24.8	28.525	29.5	30.15	29.425	30.9		30.3
		19	24.8	28.2	28.5	30.375	30.475	30.9		29.15
		21	24.05	28.2	29	29.875	30.1	30.075		30.6
		23	24.8	27.5	29.5	29.2	30.1	30.075		31.25
		25	24.8	28.6333	28.5	29.8		29.8		31.0333
	n=12	1	28.2	28.4	30.3	28.3	29	30.2		32
		3	28.8	28.48	31.5	27.86	28.22	25.66		32.22
		5	28.2	28.8	30.3	29.275	29.5	23.75		32
		7	27.6	29.6	28.725	25.75	29	25.65		30.975
		9	27.9	30	33.025	27.2	29.75	27.05		30.875
		11	27.3	28.8	30.3	27.2	28.775	27.6		30.6
		13	27.05	30.8	29.9	27.2	28.65	31.25		30.15
		15	27.9	28.4	29.5	27.75	29.25	30.8		31.25
		17	28.2	29.2	29.5	28.625	29.5	30.2		30.5
		19	28.2	29.2	29.9	28.3	29.75	30.2		30.875
		21	27.975	28.4	31.225	28.625	28.65	30.2		30.875
		23	28.95	29.225	32.6	28.075	29.5	30.2		30.875
		25	27.4	28.2	29.5	28.3		30.2		31.5
		means	27.741	27.4712	27.0936	29.4853	29.0429	29.1273	28.1488	26.2641
			26.9931	26.5065	27.5508	29.6326	28.6256	30.1412	26.8592	29.0219
			27.83	26.1117	28.4849	28.8927	29.8635	28.9622	27.7962	29.2299
			27.53	28.8558	29.1154	28.9173	30.5867	25.7008	28.5005	28.8146
			26.6838	22.9296	28.0651	29.8823	27.3373	29.8512	30.4865	29.3596
			27.7438	27.3812	29.2349	28.8062	29.8682	28.2491	29.6172	29.0731
			27.4562	26.2836	29.5071	29.6519	28.69	30.7596	26.2438	29.0087
			27.6538	29.0354	29.3723	29.9967	29.1717	29.6583	27.3941	30.1014
			27.3538	27.3558	29.7288	29.6664	29.89	29.5423	27.54	30.9019
			20.4288	28.6273	29.6562	30.7519	29.6213	30.6169		30.9301
			25.8981	29.3495	29.2269	29.8042	29.7988	30.0996		30.9268
			27.975	29.0388	30.4827	27.8815	29.1287	28.6892		31.1304

## Sheet: figures
	Figures 4a/4b
		MEAN									SEM
		V	C 0.1	C 100	M	T	CMF	AITC	CPZ		Vehicle	C 0.1	C 100	M	T	CMF	AITC	CPZ
	1	27.125	26.3667	29.5583	29.7667	28.8833	29.8667	26.5444	29.225		0.740303	1.85216	0.752315	0.357248	0.526687	0.417121	0.856484	0.766251
	3	27.465	26.655	29.0333	29.7317	29.0517	29.4683	27.4267	29.8067		0.425036	1.30136	0.558322	0.20945	0.527202	0.423531	0.758694	0.576123
	5	27.7312	28.1937	28.9458	29.9812	29.7458	29.2188	28.1972	30.0083		0.257099	0.505679	0.516222	0.159341	0.167418	0.572004	0.538691	0.451348
	7	27.4646	27.7792	28.5979	29.4854	29.1812	29.2625	28.4694	29.325		0.328037	0.616663	0.444872	0.412477	0.395609	0.401789	0.407926	0.554749
	9	26.875	27.875	29.1083	29.8083	29.5521	29.3042	28.2583	29.5312		0.58045	0.491981	0.422445	0.317816	0.239267	0.422092	0.399691	0.567758
	11	26.35	28.0813	28.8729	29.4583	29.4229	29.7312	28.2028	29.4625		0.781037	0.40315	0.324394	0.276363	0.192754	0.38125	0.407233	0.384458
	13	26.4417	27.1354	29.0542	29.2083	29.9	29.3604	28.2667	30.0083		0.844503	0.605565	0.270273	0.20724	0.206935	0.348732	0.407945	0.466626
	15	26.4729	27.4333	28.8896	29.3604	29.4229	29.6375	28.1361	29.6417		0.848146	0.324086	0.205706	0.29162	0.308811	0.49407	0.335548	0.657455
	17	26.375	27.6208	28.8271	29.6042	29.5542	29.8271	28.2444	29.3667		0.844832	0.430599	0.1711	0.208322	0.198165	0.537112	0.33709	0.447619
	19	26.1521	27.4062	28.6937	29.1833	29.4333	29.4917	28.0694	29.4812		0.856241	0.346904	0.294458	0.242293	0.377082	0.795223	0.255506	0.570163
	21	26.2542	26.8417	29.2917	29.4187	28.8292	28.9333	28.275	29.4021		0.84851	0.460096	0.347343	0.352563	0.390292	0.803422	0.457063	0.601273
	23	26.5354	27.2229	28.7833	29.1125	28.8	28.5208	28.4861	29.4896		0.890876	0.36182	0.545725	0.386129	0.346451	0.852147	0.379129	0.551483
	25	26.8194	27.7472	28.8222	28.6972	28.9167	28.0583	28.2704	29.5778		0.59981	0.489407	0.284129	0.407639	0.535404	1.18226	0.39094	0.503529
	mean	26.774	27.4122	28.9599	29.4474	29.2841	29.2831	28.0652	29.5635		0.680375	0.629959	0.395177	0.2945	0.33939	0.586981	0.456303	0.546064
										°C

## Sheet: statistics
	STATISTICS
		mean for the first 24 hours - n=12
		Vehicle	C 0.1	C 100	M	T	CMF	AITC	CPZ		water
		27.741	27.4712	27.0936	29.4853	29.0429	29.1273	28.1488	26.2641		27.9569
		26.9931	26.5065	27.5508	29.6326	28.6256	30.1412	26.8592	29.0219		27.3
		27.83	26.1117	28.4849	28.8927	29.8635	28.9622	27.7962	29.2299		29.0625
		27.53	28.8558	29.1154	28.9173	30.5867	25.7008	28.5005	28.8146		27.9731
		26.6838	22.9296	28.0651	29.8823	27.3373	29.8512	30.4865	29.3596		27.1237
		27.7438	27.3812	29.2349	28.8062	29.8682	28.2491	29.6172	29.0731		29.2233
		27.4562	26.2836	29.5071	29.6519	28.69	30.7596	26.2438	29.0087		27.9569
		27.6538	29.0354	29.3723	29.9967	29.1717	29.6583	27.3941	30.1014		27.3
		27.3538	27.3558	29.7288	29.6664	29.89	29.5423	27.54	30.9019		29.0625
		20.4288	28.6273	29.6562	30.7519	29.6213	30.6169		30.9301		27.9731
		25.8981	29.3495	29.2269	29.8042	29.7988	30.0996		30.9268		27.1237
		27.975	29.0388	30.4827	27.8815	29.1287	28.6892		31.1304		29.2233
		KRUSKAL-WALLIS TEST
		Rangi
		VAR00007		N	Średnia ranga
		VAR00008	1,00	12	17.9167
			2,00	12	26
			3,00	12	51.3333
			4,00	12	62
			5,00	12	58.75
			6,00	12	60.0833
			7,00	9	33.4444
			8,00	12	63.0833
			Ogółem	93
		Wartość testowanaa,b
			VAR00008
		Chi-kwadrat	36.8375
		df	7
		Istotność asymptotyczna	5.03509e-06
		a. Test Kruskala-Wallisa
		b. Zmienna grupująca: VAR00007
		vehicle - capsaicin 0.1µ			vehicle - capsaicin 100µ			vehicle-menthol			vehicle-thymol			vehicle-camphor			vehicle-aitc			vehicle-capsazepine
		Wartość testowanaa			Wartość testowanaa			Wartość testowanaa			Wartość testowanaa			Wartość testowanaa			Wartość testowanaa			Wartość testowanaa
			VAR00008			VAR00008			VAR00008			VAR00008			VAR00008			VAR00008			VAR00008
		U Manna-Whitneya	61		U Manna-Whitneya	13		U Manna-Whitneya	1		U Manna-Whitneya	8		U Manna-Whitneya	11		U Manna-Whitneya	33		U Manna-Whitneya	10
		W Wilcoxona	139		W Wilcoxona	91		W Wilcoxona	79		W Wilcoxona	86		W Wilcoxona	89		W Wilcoxona	111		W Wilcoxona	88
		Z	-0.635085		Z	-3.40637		Z	-4.09919		Z	-3.69504		Z	-3.52184		Z	-1.49241		Z	-3.57957
		Istotność asymptotyczna (dwustronna)	0.525373		Istotność asymptotyczna (dwustronna)	0.000658337		Istotność asymptotyczna (dwustronna)	4.14604e-05		Istotność asymptotyczna (dwustronna)	0.000219851		Istotność asymptotyczna (dwustronna)	0.000428568		Istotność asymptotyczna (dwustronna)	0.135593		Istotność asymptotyczna (dwustronna)	0.000344158
		Istotność dokładna [2*(jednostronna)]	,551b		Istotność dokładna [2*(jednostronna)]	,000b		Istotność dokładna [2*(jednostronna)]	,000b		Istotność dokładna [2*(jednostronna)]	,000b		Istotność dokładna [2*(jednostronna)]	,000b		Istotność dokładna [2*(jednostronna)]	,148b		Istotność dokładna [2*(jednostronna)]	,000b
		a. Zmienna grupująca: VAR00007			a. Zmienna grupująca: VAR00007			a. Zmienna grupująca: VAR00007			a. Zmienna grupująca: VAR00007			a. Zmienna grupująca: VAR00007			a. Zmienna grupująca: VAR00007			a. Zmienna grupująca: VAR00007
		b. Nieskorygowane ze względu na wiązania.			b. Nieskorygowane ze względu na wiązania.			b. Nieskorygowane ze względu na wiązania.			b. Nieskorygowane ze względu na wiązania.			b. Nieskorygowane ze względu na wiązania.			b. Nieskorygowane ze względu na wiązania.			b. Nieskorygowane ze względu na wiązania.
		holm correction
				p		rank			HOLM		result		corrected p value
		v	k0.1	0.551		4.14e-05			0.00625		s		0.0002898		m
			k100	0.001		0.000219			0.00714286		s		0.001314		t
			m	4.14e-05		0.000344			0.00833333		s		0.00172		kpz
			t	0.000219		0.000428			0.01		s		0.00172		kmf
			cmf	0.000428		0.001			0.0125		s		0.003		k100
			aitc	0.136		0.136			0.0166667		ns		0.272
			kpz	0.000344		0.551			0.025		ns		0.551
