# Supplementary material for: Altered heat nociception in cockroach Periplaneta americana L. exposed to capsaicin
Source: PLoS One. 2018 Mar 8;13(3):e0194109. doi: 10.1371/journal.pone.0194109 (PMC5843330; doi:10.1371/journal.pone.0194109)
Supplement: S3 Spreadsheet — Malondialdehyde concentration (MDA; μmol/mg protein) in cockroaches exposed to single-trial and five-trial heat box test treated with water, alcohol, capsaicin 0.0001mM and 0.1mM, menthol 2mM, thymol 1mM, camphor 15mM, allyl isothiocyanate 3mM and capsazepine 0.0001mM. (XLSX) [file pone.0194109.s003.xlsx]

## Sheet: data
			MDA	µmol/mg protein
		single-trail heat box test			females	males							five-trail heat box test			females	males
		control	alcohol	caps 0,1	caps100	menthol	thymol	camphor	aitc	capsazepine			control	alcohol	caps 0,1	caps100	menthol	thymol	camphor	aitc	capsazepine
		4.56164	1.39825	5.6107	9.89293	28.8956	6.37546	2.78064	3.83999	5.32988			1.02303	9.78772	6.61929	5.42308	16.8447	1.31128	1.81731	2.45759	2.77807
		1.73609	7.35587	20.7984	8.68181	5.24926	15.9425	1.23443	7.44041	6.4253			5.38261	5.97665	13.0141	3.21703	9.83464	7.72527	6.79434	4.49525	1.24331
		6.99123	0.153247	7.73077	9.63934	4.5503	9.13014	4.74521	6.58964	2.86877			9.97129	12.7195	12.8288	11.6598	7.90216	0.364856	9.75099	6.28314	8.23841
		5.80047	1.22175	10.1595	11.1124	61.0282	11.2201	2.31192	5.11528	5.43195			22.481	4.58157	6.14064	6.3246	3.55759	1.85799	8.80248	8.52546	2.00338
		1.54128	4.75067	7.55579	9.13215	9.49482	7.22344	5.43762	12.1065	4.20689			31.5311	11.1871	7.62187	7.69527	4.0093	2.67572	6.68533	33.2547	2.71591
		6.78163	2.15039	5.30163	8.9838	5.86958	6.02927	4.77251	4.29093	3.43808			5.15885	11.8272	4.18428	6.04142	4.98637	2.92857	7.37954	8.27536	18.9069
		4.98281	4.41864	4.25962	11.2094	7.80516	6.28374	53.8521	20.1446	2.29903			3.85989	12.087	6.99827	13.3707	6.21872	4.42308	13.3858	6.45858	5.35027
		5.16758	0.48563	27.4749	13.4763	9.20604	9.70139	10.5741	23.2467	4.11803			40.1075	10.0893	21.8086	6.02536	6.28402	1.1082	5.59172	8.46735	11.4041
		7.11419	0.161877	43.8071	9.31012	8.29012	7.29322	0.766237	4.0119	1.46978			12.5192	12.5865	14.602	4.53899		0.364856	19.0247	6.17216	3.96309
		4.05769	0.166631	2.21154	6.96605	6.67343	32.4981	0.153423	9.27937	4.94083			7.57132	14.8602	9.7332	6.1287		3.24852	14.645	9.898	4.56396
		0.653846	0.657368	6.40194	9.67258	30.8609	5.52959	3.00204	0.515216	4.9963			61.2408	12.83	11.4258	11.4463			12.053	5.83911	6.47788
		0.493026	0.662299	6.74155	8.33358	9.4359	4.61965	22.1015	3.43269	5.61549			5.67387	12.3963	14.8126	12.9979				1.79808	14.8542
		0.989222	1.48859	8.80262	3.92847	6.37003	6.15318	14.2697	1.94675				12.42							3.56903
		2.49683	7.19231	9.1225	7.65356	6.57143	4.55516	3.11246	3.25514				6.6782							5.53374
		0.653846	4.52268	10.4684	8.62232	5.39645	5.25271	4.06893	18.3006				3.92308							1.88138
		0.165575	5.19696	5.17258	4.7574	18.1843	5.9217	0.877184	1.04417				8.05276							1.74028
		14.478		2.21909	2.8694	8.79746	3.50444	1.79808	0.496196				1.48383							3.80417
					20.0028			10.4165	2.12958				14.4816							1.96577
					7.7313			28.3093	26.7253				12.75							3.54191
									3.24458				14.405
													12.0934
	mean	4.03912	2.62395	10.814	9.05135	13.687	8.66081	9.18863	7.85779	4.26169			13.9433	10.9108	10.8158	7.90576	7.45468	2.60083	9.63002	6.52427	6.87496
	sd	3.65655	2.53909	10.6347	3.66452	14.5105	6.8274	13.2057	7.98086	1.48674			14.4922	2.9574	4.9525	3.49831	4.31087	2.22498	4.82918	6.9587	5.53205
	s.e.m.	0.886844	0.634773	2.5793	0.840699	3.51932	1.65589	3.02959	1.78457	0.429185			3.16246	0.853727	1.42966	1.00988	1.52412	0.703601	1.45605	1.59643	1.59697
