# Supplementary material for: Altered heat nociception in cockroach Periplaneta americana L. exposed to capsaicin
Source: PLoS One. 2018 Mar 8;13(3):e0194109. doi: 10.1371/journal.pone.0194109 (PMC5843330; doi:10.1371/journal.pone.0194109)
Supplement: S4 Spreadsheet — Catalase activity (U/mg protein) in cockroaches exposed to single-trial and five-trial heat box test treated with water, alcohol, capsaicin 0.0001mM and 0.1mM, menthol 2mM, thymol 1mM, camphor 15mM, allyl isothiocyanate 3mM and capsazepine 0.0001mM. (XLSX) [file pone.0194109.s004.xlsx]

## Sheet: data
	catalase activity U/mg protein
		single-trail heat box test			females	males							five-trail heat box test			females	males
		control	alcohol	caps 0,1	caps100	menthol	thymol	camphor	aitc	capsazepine			control	alcohol	caps 0,1	caps100	menthol	thymol	camphor	aitc	capsazepine
		40.9859	40.7876	6.73718	62.1599	50.6467	62.0215	50.8292	48.43	60.5727			11.5359	123.667	112.013	59.2422	60.0235	51.2665	7.2783	33.7906	77.6863
		9.77575	15.6411	61.2639	62.7009	133.703	53.2619	83.9193	38.9251	54.2081			20.5242	140.567	104.13	78.8247	59.881	52.6683	63.1773	21.8906	91.2238
		8.33485	40.6309	55.1576	63.1093	65.6101	67.6277	82.9752	44.4064	66.987			42.6426	109.702	89.924	60.2075	72.0983	68.4144	88.0138	26.3891	63.3009
		16.3442	21.829	78.4407	54.9814	46.2394	78.8718	75.4349	45.5015	45.2834			42.4228	137.717	88.6798	102.275	70.2956	66.6394	91.4778	19.6392	99.7505
		20.9144	31.1024	49.051	62.2699	60.55	69.7683	74.8364	18.1581	48.3191			26.1261	129.236	149.892	59.5473	74.2983	71.7582	126.066	22.6365	106.753
		18.5906	68.3402	61.7373	53.8034	58.4204	56.1967	43.6663	7.37109	61.0873			22.2206	126.465	219.921	72.5285	71.5859	57.9705	104.836	32.9818	95.7165
		25.3019	112.652	60.2883	70.332	60.8127	63.5757	70.885	13.6165	64.7728			42.6891	53.7016	73.3044	59.3445	45.7923	64.7502	131.316	12.4245	92.5451
		43.1056	3.74438	62.1644	64.4547	57.8915	72.8867	69.7557	9.30593	54.7542			75.8521	46.9889	83.7034	48.4873	53.0329	62.8493	127.121	15.8778	81.2309
		17.1019	4.76557	62.7067	54.4389	44.5633	69.5957	68.677	6.24931	34.3036			12.3348	48.0565	68.114	66.0284		59.3529	14.1198	13.319	68.5464
		20.9001	14.3848	20.3688	62.2133	33.5564	61.0571	59.4398	4.27548	47.2308			55.4353	46.3192	82.6832	63.251		71.2418	101.401	16.42	77.974
		3.85585	24.6439	43.3628	48.3086	42.3514	44.1252	61.3791	18.7698	45.5483			93.9157	48.1735	92.595	58.8847			107.251	11.3785	67.9933
		3.34217	115.48	46.246	33.9201	43.1668	48.2542	69.9753	27.9791	49.4554			25.0663	51.2468	106.589	58.5919				10.6761	58.0917
		3.47586	57.968	27.8842	44.8777	33.8485	45.7115	42.383	13.5864				68.7191							12.4087
		20.3944	17.8662	46.9783	41.7576	46.0932	37.016	50.6142	12.188				17.3414							11.9536
		11.9806	80.8503	48.0837	46.5721	39.5161	45.1607	39.7321	16.5919				50.3122							16.3677
		7.27886	63.2777	45.1146	47.8125	41.4534	52.6208	41.6316	24.2222											14.3713
		2.90854	62.8355	52.8904	27.4802	38.2384	46.2904	36.7334	20.1555											17.4539
		85.4699			44.1804			56.4031	37.3374											15.8285
					51.0699				18.6532											14.4669
									26.4934
	mean	20.0034	45.6941	48.7339	52.4444	52.7448	57.2966	59.9595	22.6108	52.7102			40.4759	88.4868	105.963	65.6011	63.376	62.6912	87.4597	17.9092	81.7344
	sd	20.1235	34.6626	17.3764	11.2122	23.0492	12.0065	15.3408	13.7109	9.50072			24.7534	41.8692	41.8089	13.8366	10.3529	7.24448	42.7652	6.8393	15.5072
	s.e.m.	4.49976	7.75079	3.88547	2.50711	5.15396	2.68475	3.43031	3.06586	2.12443			5.53503	9.36224	9.34876	3.09396	2.31498	1.61991	9.5626	1.52931	3.46753
